# Supplementary material for: Addition of a carboxy-terminal tail to the normally tailless gonadotropin-releasing hormone receptor impairs fertility in female mice
Source: eLife journal article supplement (doi:10.7554/elife.72937), 2021-12-23
Supplement: supp [file elife_poa_e72937_Figure_1_figure_supplement_1.pdf › elife_poa_e72937_Figure_1_figure_supplement_1.pdf]

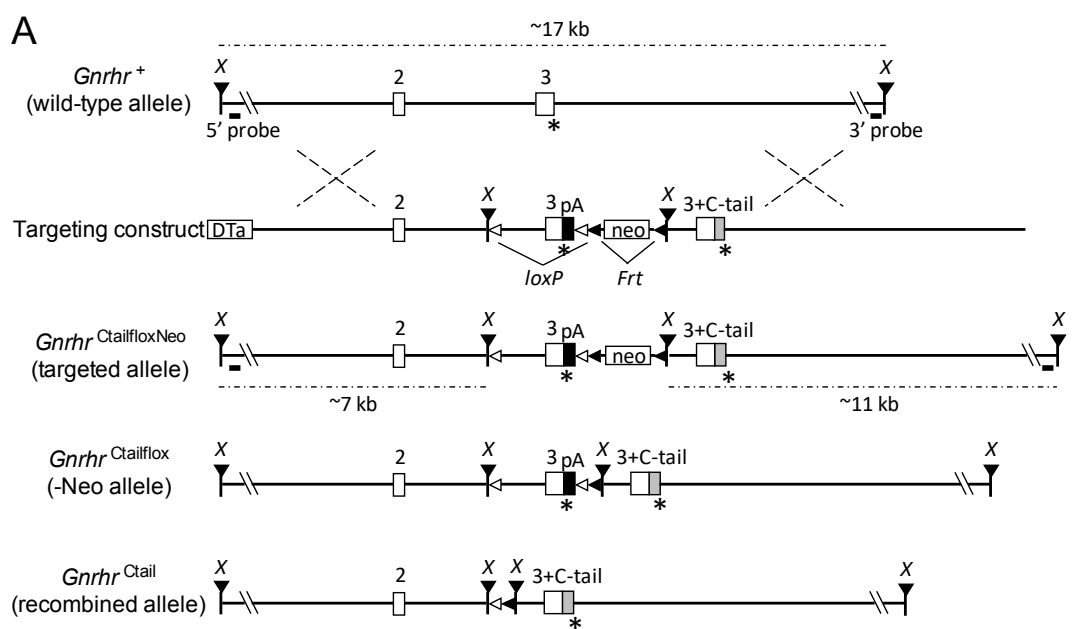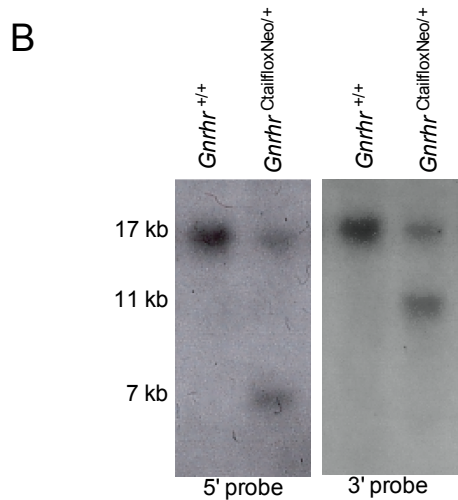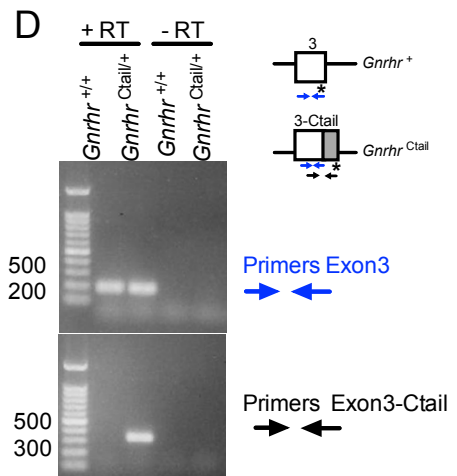

**C**

| Genotype   | <i>Gnrhr</i> <sup>+/+</sup> | <i>Gnrhr</i> <sup>Ctail/+</sup> | <i>Gnrhr</i> <sup>Ctail/Ctail</sup> |
|------------|-----------------------------|---------------------------------|-------------------------------------|
| Number     | 37                          | 75                              | 36                                  |
| Expected % | 25 %                        | 50 %                            | 25 %                                |
| Observed % | 25 %                        | 50.7 %                          | 24.3 %                              |

**Figure 1-figure supplement 1**
