# Supplementary material for: Addition of a carboxy-terminal tail to the normally tailless gonadotropin-releasing hormone receptor impairs fertility in female mice
Source: eLife journal article supplement (doi:10.7554/elife.72937), 2021-12-23
Supplement: supp [file elife_poa_e72937_Figure_2_figure_supplement_1.pdf › elife_poa_e72937_Figure_2_figure_supplement_1.pdf]

A

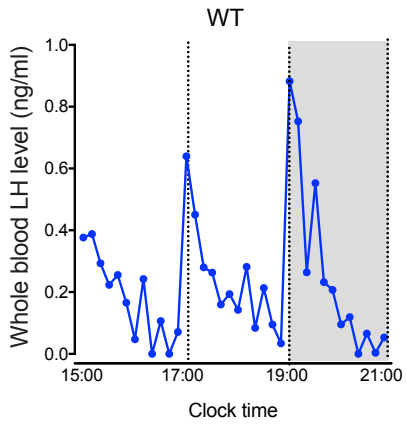

B

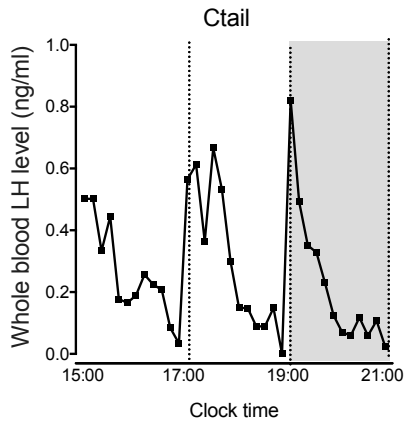

C

Deconvolution of 6-hour LH profiles

| Genotype                       | WT (N=6) |               | Ctail (N=6) |                 |         |
|--------------------------------|----------|---------------|-------------|-----------------|---------|
| Parameter                      | Median   | Range         | Median      | Range           | P value |
| Pulse frequency (#/6h)         | 4        | (2-7)         | 3           | (2-7)           | 0.37    |
| Slow half-life (min)           | 5.09     | (4-11.55)     | 4           | (4-12)          | 1       |
| Mode (min)                     | 13.3     | (11.7-14.5)   | 16.9        | (15.0-21.8)     | 0.003   |
| Basal secretion (ng/mL/6h)     | 4.58     | (0.36-31.5)   | 5.55        | (1.06-37.5)     | 0.64    |
| Pulsatile secretion (ng/mL/6h) | 6.47     | (1.20-23.8)   | 14.69       | (0.97-23.7)     | 0.26    |
| Total secretion (ng/mL/6h)     | 10.96    | (1.65-45.0)   | 17.37       | (2.03-61.0)     | 0.42    |
| Mean pulse mass (ng/mL)        | 2.25     | (0.38-3.96)   | 3.82        | (0.48-7.35)     | 0.076   |
| Weibull lambda (#/24h)         | 19.4     | (11.9-26.8)   | 13.3        | 13.3(11.0-25.9) | 0.27    |
| AUC (ng. 6h/mL)                | 80       | (4.8-163)     | 93          | (6.4-22.8)      | 0.41    |
| Jack ApEn (dimensionless)      | 1.211    | (0.472-1.498) | 1.198       | (0.261-1.536)   | 0.67    |

Figure 2-figure supplement 1
