# Supplementary material for: Addition of a carboxy-terminal tail to the normally tailless gonadotropin-releasing hormone receptor impairs fertility in female mice
Source: eLife journal article supplement (doi:10.7554/elife.72937), 2021-12-23
Supplement: supp [file elife_poa_e72937_Figure_7_figure_supplement_2.pdf › elife_poa_e72937_Figure_7_figure_supplement_2.pdf]

A

GnRHR-WT +  
YFP-Arrestin1GnRHR-Ctail +  
YFP-Arrestin1

Unstimulated

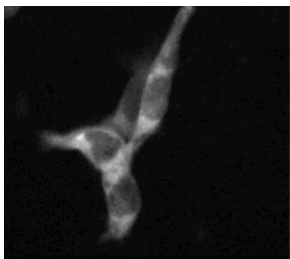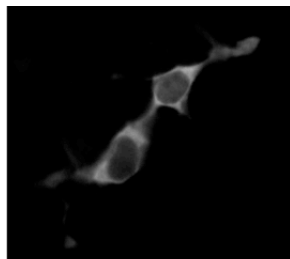

GnRH

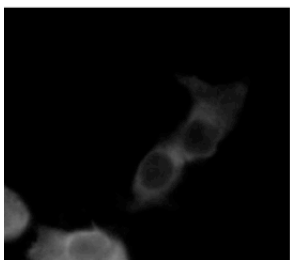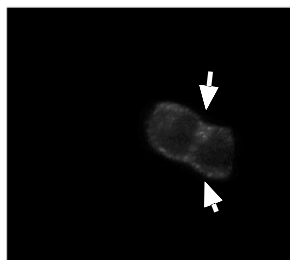

1 min

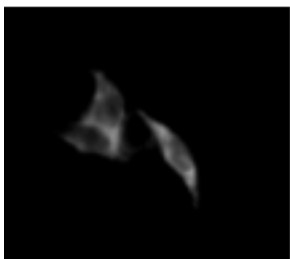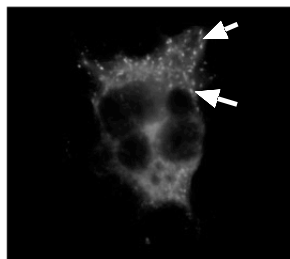

5 min

B

GnRHR-WT +  
YFP-Arrestin1GnRHR-Ctail +  
YFP-Arrestin1

Unstimulated

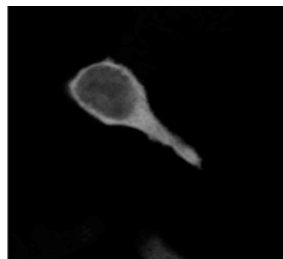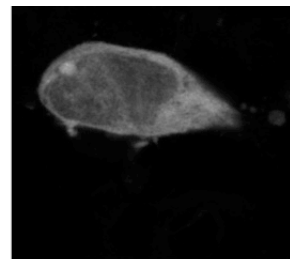

Lucrin

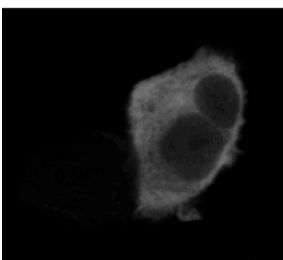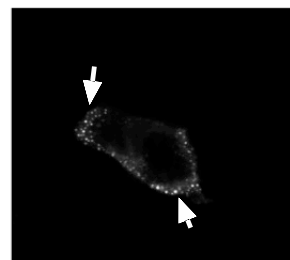

C

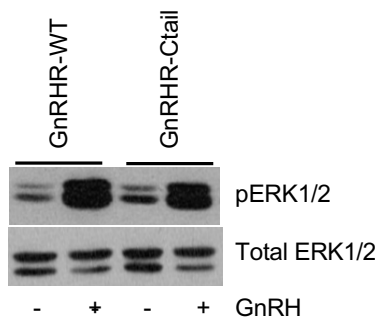

D

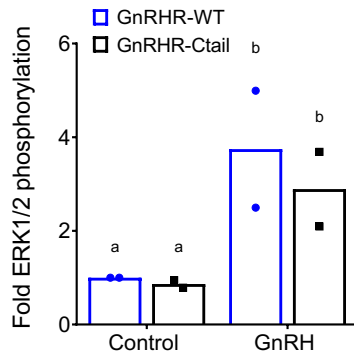

E

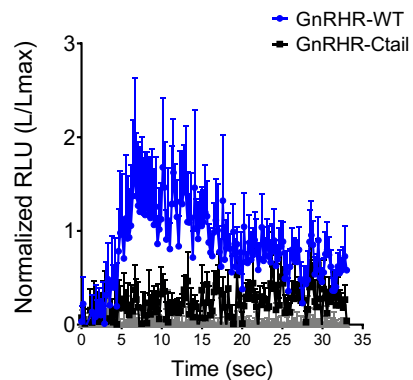

Figure 7-figure supplement 2
