# Supplementary material for: Addition of a carboxy-terminal tail to the normally tailless gonadotropin-releasing hormone receptor impairs fertility in female mice
Source: eLife journal article supplement (doi:10.7554/elife.72937), 2021-12-23
Supplement: supp [file elife_poa_e72937_Figure_10_figure_supplement_1.pdf › elife_poa_e72937_Figure_10_figure_supplement_1.pdf]

|         |                                                                                                                              |
|---------|------------------------------------------------------------------------------------------------------------------------------|
| Anolis  | T P S F R E D M K M C L K G L K L T L T H Q E K S L A V I V E L K N K E D - R E Q G R P R S S V S N G G T M H T A F          |
| Gallus  | <u>T</u> P S F R E D V Q L C L R G I E A A I S Q H V R H K P I S V S E K T T K D G D V N G Q V T S G G S N G T T V N T V C   |
| Clarias | T P S F R A D L S R C F C W R N Q N A S G - - K S L V Q F S G H R R E V S G E A E S D L G S G E Q P S G Q Q A Q M I          |
| Xenopus | <u>T</u> P S F K E D L R S W I R R V S T L L S R K E K N S K Q L A G S E L N - - - - - I K D L T S M E G P T S T A V T M Q S |
|         | * * * * : * : : : :                                                                                                          |

Figure 10-figure supplement 1
