# Supplementary figures and images for: Addition of a carboxy-terminal tail to the normally tailless gonadotropin-releasing hormone receptor impairs fertility in female mice
Source: eLife journal article supplement (doi:10.7554/elife.72937), 2021-12-23

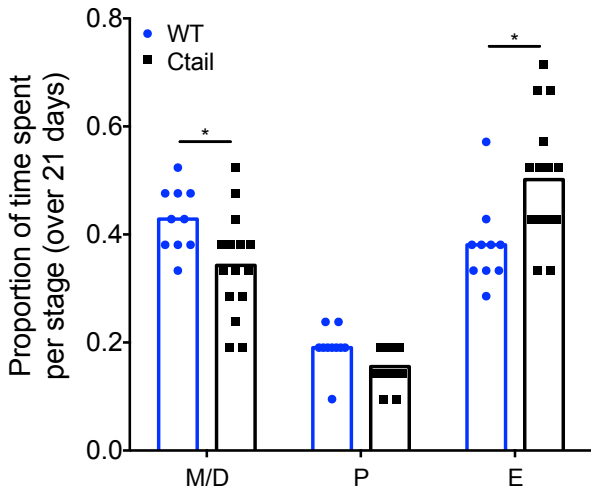

**Figure 1-figure supplement 2**

Supplement: supp [file elife_poa_e72937_Figure_1_figure_supplement_2.pdf › elife_poa_e72937_Figure_1_figure_supplement_2.pdf]

A

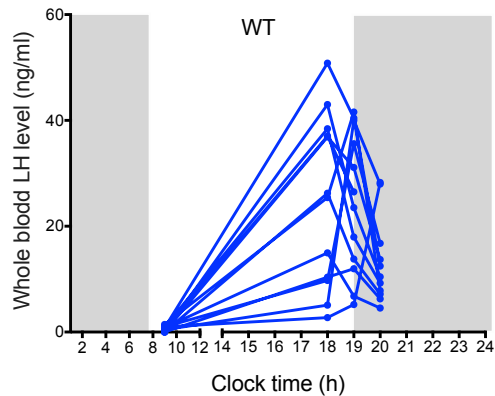

B

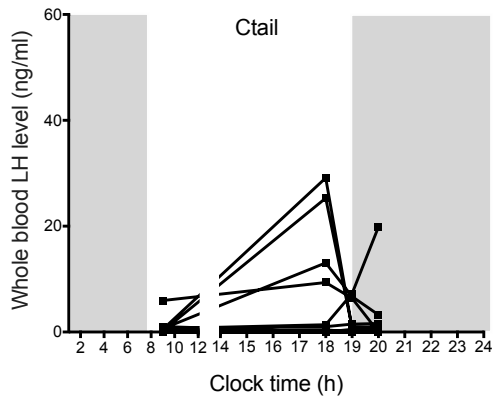

**Figure 4-figure supplement 1**

Supplement: supp [file elife_poa_e72937_Figure_4_figure_supplement_1.pdf › elife_poa_e72937_Figure_4_figure_supplement_1.pdf]

**A**

IP: anti-Flag  
IB: anti-Flag

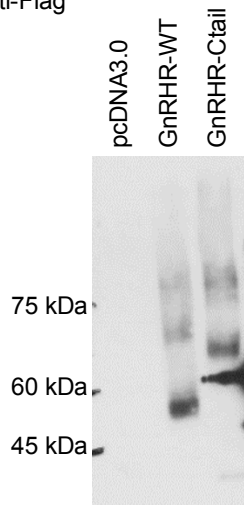**B**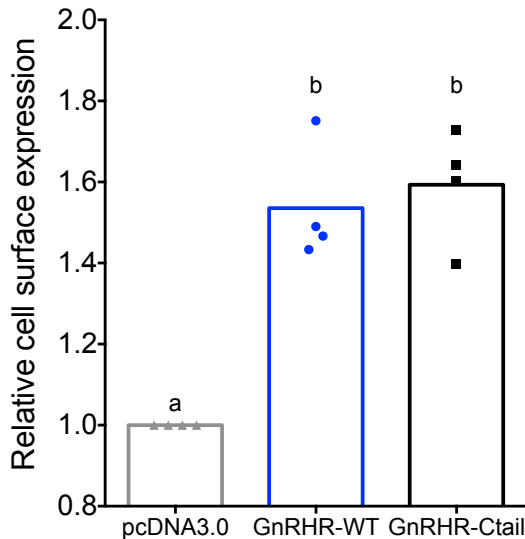

**Figure 6-figure supplement 1**

Supplement: supp [file elife_poa_e72937_Figure_6_figure_supplement_1.pdf › elife_poa_e72937_Figure_6_figure_supplement_1.pdf]

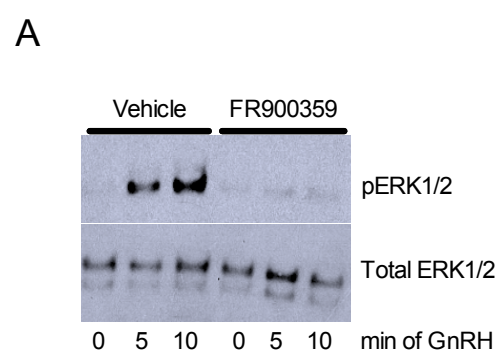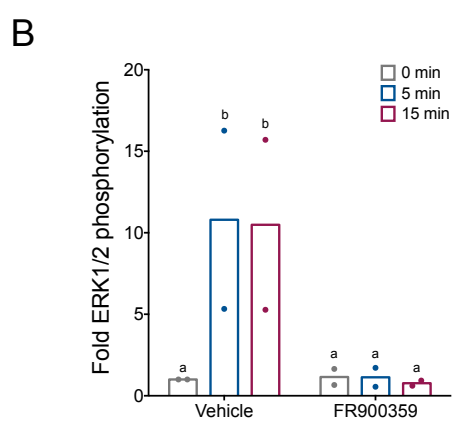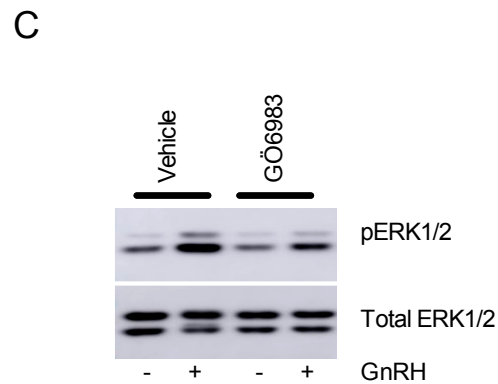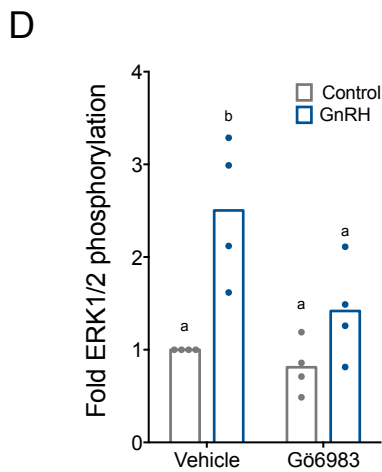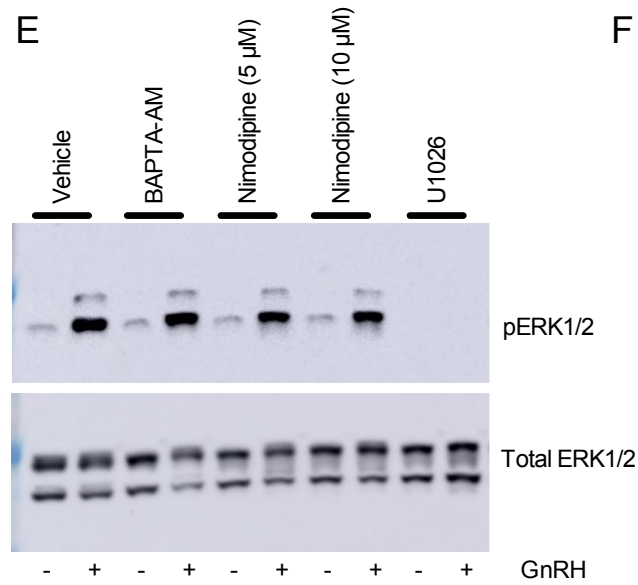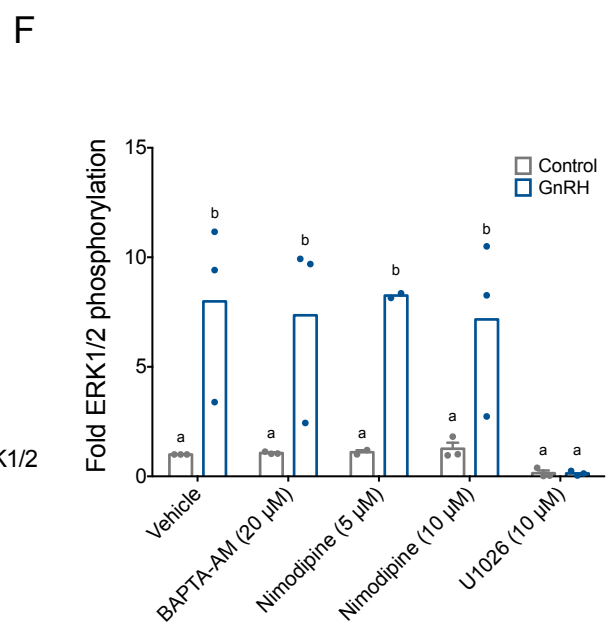

**Figure 7-figure supplement 1**

Supplement: supp [file elife_poa_e72937_Figure_7_figure_supplement_1.pdf › elife_poa_e72937_Figure_7_figure_supplement_1.pdf]

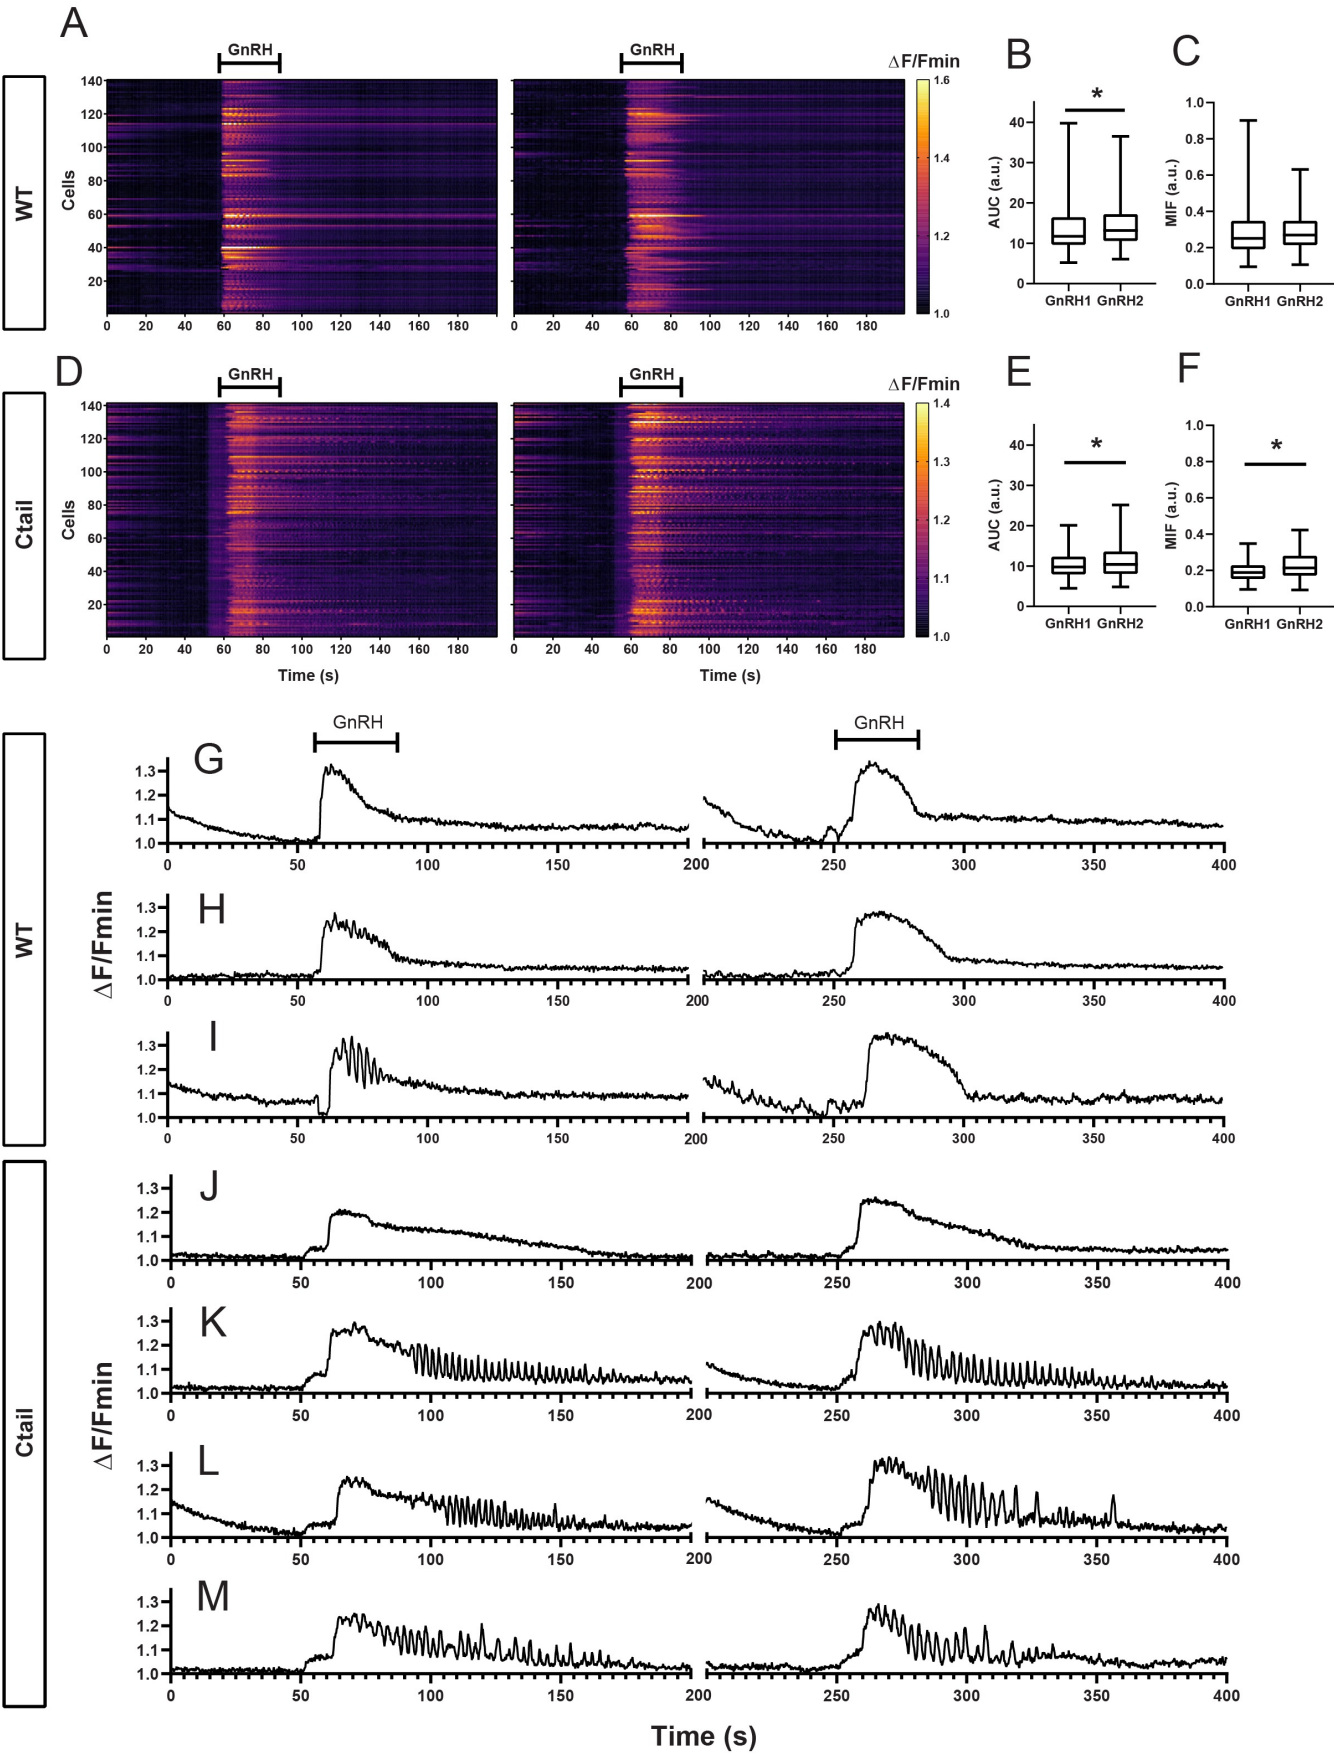

**Figure 8-figure supplement 1**

Supplement: supp [file elife_poa_e72937_Figure_8_figure_supplement_1.pdf › elife_poa_e72937_Figure_8_figure_supplement_1.pdf]

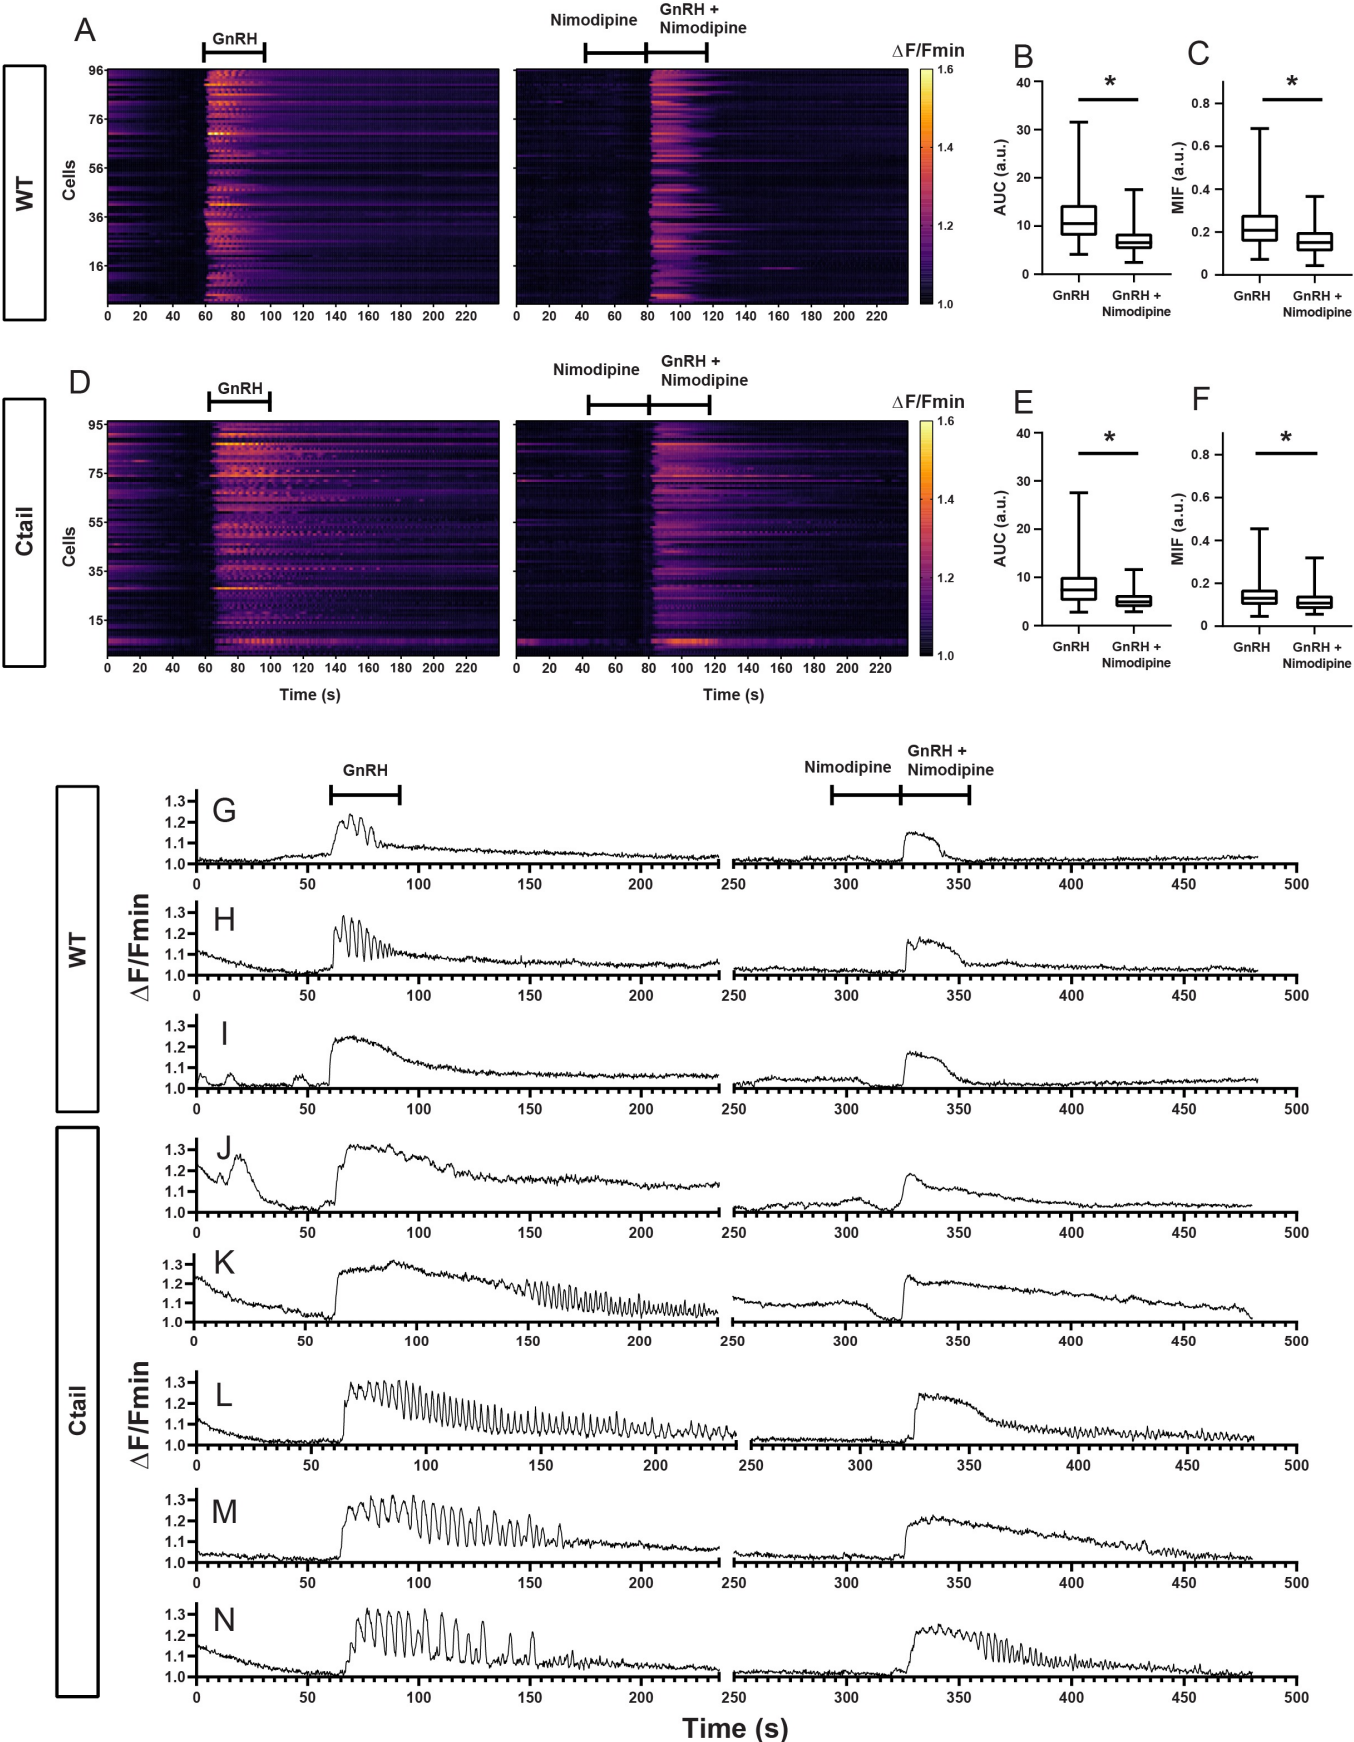

Supplement: supp [file elife_poa_e72937_Figure_8_figure_supplement_2.pdf › elife_poa_e72937_Figure_8_figure_supplement_2.pdf]

A

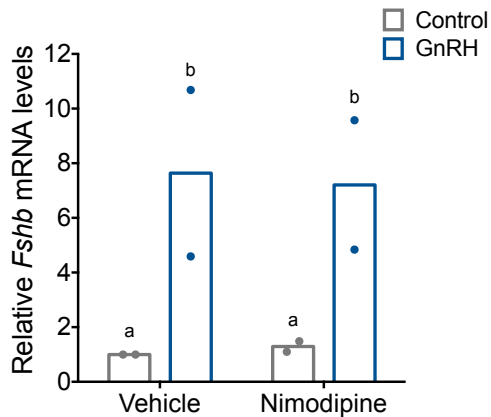

B

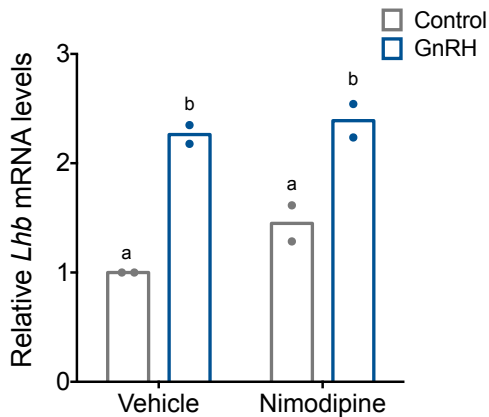

**Figure 9-figure supplement 1**

Supplement: supp [file elife_poa_e72937_Figure_9_figure_supplement_1.pdf › elife_poa_e72937_Figure_9_figure_supplement_1.pdf]
